# Supplementary material for: In Vitro and In Planta Antagonistic Effect of Endophytic Bacteria on Blight Causing Xanthomonas axonopodis pv. punicae: A Destructive Pathogen of Pomegranate
Source: MDPI journal article supplement (doi:10.3390/microorganisms11010005), 2022-12-20
Supplement: s1 [file s1]

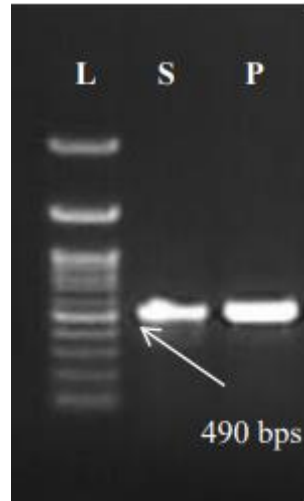

Supplementary Figure S1. PCR amplification of *Xap* DNA from pure culture and symptomatic leaf tissue using *gyrB* specific primers (S: DNA from symptomatic leaf tissues, P: DNA from pure culture of *Xap*)
